# Supplementary material for: A novel luminescent bifunctional POSS as a molecular platform for biomedical applications
Source: Royal Society of Chemistry journal article supplement (doi:10.1039/c2dt30218g), 2012-01-01
Supplement: c2dt30218g.pdf [file c2dt30218g.pdf]

## Supporting Information

### A Novel Luminescent Bifunctional POSS as a Molecular Platform for Biomedical Applications

Francesco Olivero,<sup>a</sup> Filippo Renò,<sup>b</sup> Fabio Carniato,<sup>a</sup> Manuela Rizzi,<sup>b</sup> Mario Cannas<sup>b</sup> and Leonardo Marchese<sup>a\*</sup>

<sup>a</sup>Dipartimento di Scienze e Innovazione Tecnologica, Centro Interdisciplinare Nano-Sistemi, Università del Piemonte Orientale “Amedeo Avogadro” Viale T. Michel 11, 15121 Alessandria, Italy. Fax: (+) 39 0131-360250; Tel: (+) 39 0131-360262; E-mail: leonardo.marchese@mfn.unipmn.it

<sup>b</sup>Human Anatomy Laboratory, Research Centre for Biocompatibility and Tissue Engineering Health Sciences Department, Università del Piemonte Orientale “A. Avogadro”. Via Solaroli 17, 28100, Novara (Italy).

#### Figures

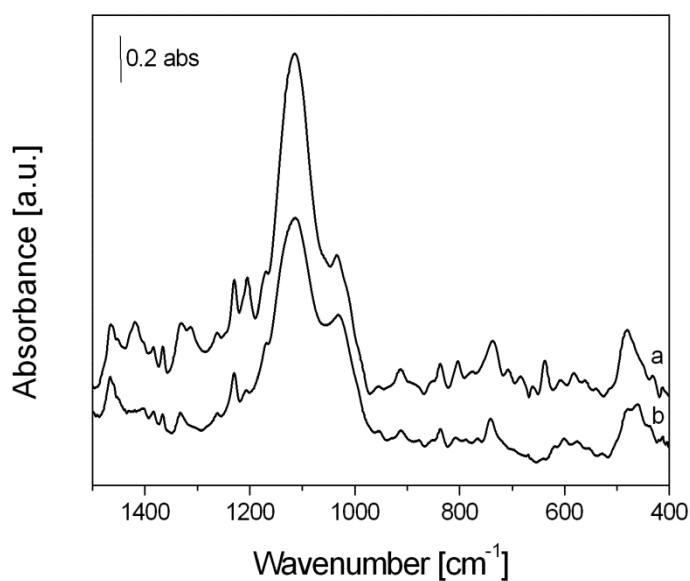

**Figure S1.** IR spectrum of POSS\_F in KBr matrix, in the range 1500 - 400  $\text{cm}^{-1}$ , before (curve a) and after (curve b) water treatment at 37°C for 7 days.

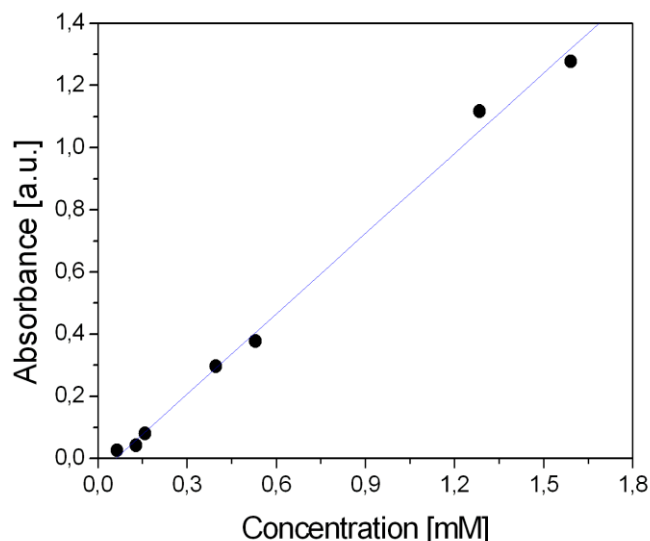

**Figure S2.** Calibration curve made with UV-Visible data for fluorescein isothiocyanate in THF solvent.

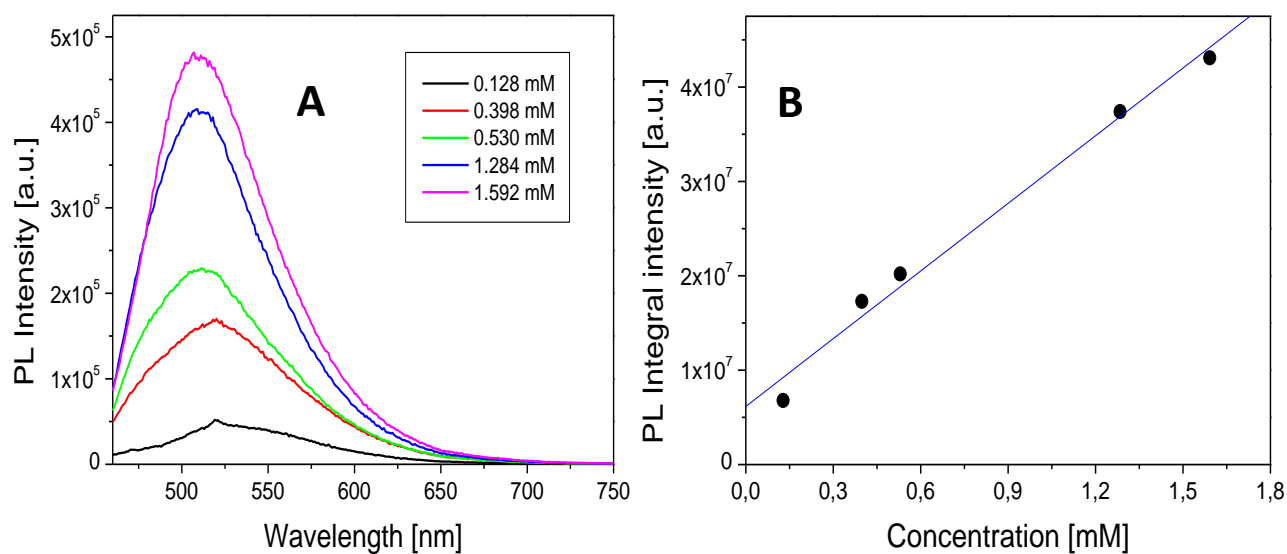

**Figure S3.** A) Photoluminescence spectra of fluorescein solution in THF from 0.128 mM to 1.592 mM under excitation at 460 nm. B) Correlation between PL integral intensity and the concentration of different solutions. Self-absorption phenomena for fluorescein dye are not present in this concentration range as indicated by the linearity relation reported in B.
